# Supplementary material
Source: publisher site journal article supplement (https://www.dovepress.com/article/330598)
Supplement: Supplementary file 1 [file get_supplementary_file.php]

Supplemental Table 1S. Patient attributes and provider type for extraction encounters (simple vs. complex) and prosthetic fixed encounters (implant vs. non-implant) for dental encounters from 9/1/18 – 8/30/19 with a billed procedure.

| Procedure Type:   | Extractions<br>N=9743   |                          | Prosthetic Fixed<br>N=952 |                             |
|-------------------|-------------------------|--------------------------|---------------------------|-----------------------------|
|                   | Simple<br>N=5765<br>(%) | Complex<br>N=3978<br>(%) | Implant<br>N=652<br>(%)   | Non-implant<br>N=300<br>(%) |
| Age               |                         |                          |                           |                             |
| <12               | 16.7                    | 0.5                      | 0                         | 0.3                         |
| 12-17             | 7.8                     | 8.8                      | 0.8                       | 0                           |
| 18-25             | 4.7                     | 22.7                     | 5.8                       | 2.0                         |
| 26-45             | 22.1                    | 28.7                     | 14.0                      | 12.7                        |
| 46-65             | 29.7                    | 24.8                     | 48.2                      | 42.3                        |
| 66+               | 19.0                    | 14.7                     | 31.3                      | 42.7                        |
| Female            | 53.0                    | 56.9                     | 58.0                      | 55.7                        |
| White             | 49.7                    | 54.5                     | 81.8                      | 75.7                        |
| Black             | 19.3                    | 18.0                     | 2.3                       | 5.0                         |
| Asian             | 10.4                    | 7.8                      | 8.1                       | 5.7                         |
| Other †           | 4.3                     | 3.9                      | 1.2                       | 2.7                         |
| Unknown           | 16.4                    | 15.9                     | 6.6                       | 11.0                        |
| Hispanic          | 5.5                     | 5.5                      | 1.2                       | 3.7                         |
| Medicaid          | 48.5                    | 49.2                     | 5.7                       | 7.3                         |
| Needs interpreter | 9.1                     | 4.8                      | 0                         | 3.0                         |
| Provider type     |                         |                          |                           |                             |
| General Dentist   | 80.5                    | 38.5                     | 31.1                      | 94.3                        |
| Endodontist       | 0                       | 0                        | 0                         | 0                           |
| Oral Surgeon      | 12.4                    | 61.0                     | 37.3                      | 0                           |
| Pediatric Dentist | 6.6                     | 0                        | 0                         | 0.3                         |
| Periodontist      | 0.5                     | 0.6                      | 9.2                       | 0                           |
| Prosthodontist    | 0.03                    | 0                        | 22.4                      | 5.3                         |

Notes:

† Other includes Native American, Pacific Islander, multiple races, or other

Supplemental Table 2S. Percentage of encounters with an opioid prescription within 7 days of the index encounter, for extraction encounters (simple vs. complex) and prosthetic fixed encounters (implant vs. non-implant), by patient attributes, and provider type.

| Procedure Type:           | Extractions<br>N=9743   |                          | Prosthetic Fixed<br>N=952 |                             |
|---------------------------|-------------------------|--------------------------|---------------------------|-----------------------------|
|                           | Simple<br>N=5765<br>(%) | Complex<br>N=3978<br>(%) | Implant<br>N=652<br>(%)   | Non-implant<br>N=300<br>(%) |
| N (%) with opioid R       | 359<br>6.2              | 2161<br>54.3             | 88<br>13.5                | 0<br>0                      |
| Age                       |                         |                          |                           |                             |
| <12                       | 0.1                     | 16.7 <sup>a</sup>        | 0 <sup>a</sup>            | 0 <sup>a</sup>              |
| 12-17                     | 1.6                     | 86.3                     | 40.0 <sup>a</sup>         | 0 <sup>a</sup>              |
| 18-25                     | 15.0                    | 85.8                     | 23.7                      | 0                           |
| 26-45                     | 10.1                    | 51.6                     | 13.2                      | 0                           |
| 46-65                     | 7.7                     | 35.3                     | 15.3                      | 0                           |
| 66+                       | 4.5                     | 25.3                     | 8.3                       | 0                           |
| Female                    | 6.4                     | 54.8                     | 13.0                      | 0                           |
| Male                      | 6.1                     | 53.7                     | 14.2                      | 0                           |
| White                     | 7.1                     | 51.0                     | 13.3                      | 0                           |
| Black                     | 5.8                     | 56.0                     | 33.3 <sup>a</sup>         | 0 <sup>a</sup>              |
| Asian                     | 4.0                     | 64.7                     | 11.3                      | 0 <sup>a</sup>              |
| Other †                   | 4.9                     | 61.0                     | 12.5 <sup>a</sup>         | 0 <sup>a</sup>              |
| Unknown                   | 5.9                     | 57.0                     | 11.6                      | 0                           |
| Hispanic                  | 5.6                     | 68.7                     | 12.5 <sup>a</sup>         | 0 <sup>a</sup>              |
| Not Hispanic or missing   | 6.3                     | 53.5                     | 13.5                      | 0                           |
| Medicaid                  | 5.7                     | 54.5                     | 32.4                      | 0                           |
| Other payment             | 6.7                     | 54.2                     | 12.4                      | 0                           |
| Needs interpreter         | 2.9                     | 38.0                     | 0 <sup>a</sup>            | 0 <sup>a</sup>              |
| Does not need interpreter | 6.6                     | 55.2                     | 13.5                      | 0                           |
| Provider type             |                         |                          |                           |                             |
| General Dentist           | 4.2                     | 19.0                     | 0                         | 0                           |
| Endodontist               | 0                       | 0 <sup>a</sup>           | 0 <sup>a</sup>            | 0 <sup>a</sup>              |
| Oral Surgeon              | 22.1                    | 77.0                     | 32.1                      | 0 <sup>a</sup>              |
| Pediatric Dentist         | 0.3                     | 0 <sup>a</sup>           | 0 <sup>a</sup>            | 0 <sup>a</sup>              |
| Periodontist              | 14.8                    | 18.2                     | 16.7                      | 0 <sup>a</sup>              |
| Prosthodontist            | 0 <sup>a</sup>          | 0 <sup>a</sup>           | 0                         | 0 <sup>a</sup>              |

Notes:

† Other includes Native American, Pacific Islander, multiple races, or other

<sup>a</sup> Denominator N < 20
